1 **Instantaneous midbrain control of saccade kinematics**

2

3 Ivan Smalianchuk<sup>1,3</sup>

4 Uday Jagadisan<sup>1,3</sup>

5 Neeraj J. Gandhi<sup>1-3</sup>

6

7 Departments of <sup>1</sup>Bioengineering and <sup>2</sup>Neuroscience

8 <sup>3</sup>Center for Neural Basis of Cognition

9 University of Pittsburgh, Pittsburgh, PA USA

10

11 Address correspondence to:

12 Neeraj Gandhi

13 [neg8@pitt.edu](mailto:neg8@pitt.edu)

14

## 15 **Abstract**

16

17 The ability to interact with our environment requires the brain to transform spatially-represented sensory  
18 signals into temporally-encoded motor commands for appropriate control of the relevant effectors. For  
19 visually-guided eye movements, or saccades, the superior colliculus (SC) is assumed to be the final stage  
20 of spatial representation, and instantaneous control of the movement is achieved through a rate code  
21 representation in the lower brain stem. We questioned this dogma and investigated whether SC activity  
22 also employs a dynamic rate code, in addition to the spatial representation. Noting that the kinematics of  
23 repeated movements exhibits trial-to-trial variability, we regressed instantaneous SC activity with  
24 instantaneous eye velocity and found a robust correlation throughout saccade duration. Peak correlation  
25 was tightly linked to time of peak velocity, and SC neurons with higher firing rates exhibited stronger  
26 correlations. Moreover, the strong correlative relationship was preserved when eye movement profiles  
27 were substantially altered by a blink-induced perturbation. These results indicate that the rate code of  
28 individual SC neurons can control instantaneous eye velocity, similar to how primary motor cortex  
29 controls hand movements, and argue against a serial process for transforming spatially encoded  
30 information into a rate code.

31

## 32 **Introduction**

33

34 Even when we wish to produce the same movement repeatedly, our action exhibits heterogeneity across  
35 repetitions. This explains, in part, why intended identical swings of a tennis racket, for example, do not  
36 result in identical trajectories of a ball. It is possible the variability could be the result of biological noise  
37 in the effectors, although a more likely explanation points to a neural origin (Carmena et al., 2005;  
38 Churchland et al., 2006; van Beers, 2007, 2008). While potential neural sources of movement variability  
39 have been extensively studied for hand movements (for a review, see (Churchland, 2015)), less is known  
40 about their impact on eye movements, particularly the ballistic type known as saccades.

41

42 The superior colliculus (SC), a laminar subcortical structure with a topographic organization of the  
43 saccade motor map, is a central node in the oculomotor neuraxis (Gandhi and Katnani, 2011; Basso and  
44 May, 2017). It is intimately linked to the spatiotemporal transformation, in which visuo-oculomotor  
45 signals in the SC conform to a space or place code, while recipient structures in the brainstem exhibit a  
46 rate code. In a slight modification to this framework - the so-called dual coding hypothesis (Sparks and  
47 Mays, 1990) - saccade amplitude and direction are computed from the locus of population activity in the  
48 SC, while movement velocity is a “determinant” of these neurons’ firing rates. The strongest evidence for  
49 SC control of saccade velocity comes from causal studies demonstrating that peak eye velocity is  
50 correlated with frequency or intensity of electrical microstimulation (Stanford et al., 1996; Katnani and  
51 Gandhi, 2012) and that peak velocity is attenuated after inactivation of SC (Sparks et al., 1990). However,  
52 these results only address the distribution in static saccade descriptors, falling short of explaining dynamic  
53 properties of the movement (e.g. instantaneous velocity). On the other hand, the dynamic vector  
54 summation algorithm (Goossens and Van Opstal, 2006) presents a framework in which the SC controls  
55 the desired instantaneous displacement of the eye through a series of mini-vectors, but does not directly  
56 address the possibility of instantaneous control of ocular kinematics.

57  
58 In this study, we tested the hypothesis that SC activity dynamically controls the instantaneous velocity of  
59 saccades. Time series correlation was first performed on individual trials by regressing the temporal  
60 evolution of SC activity with eye velocity within each trial. This analysis, by definition, cannot reveal  
61 which epoch(s) of the waveforms contribute most significantly to the correlation. We addressed this latter  
62 limitation by correlating the instantaneous neural activity and eye velocity across trials, an ensemble  
63 approach that calculates the correlation between firing rate and velocity on individual timepoint basis. We  
64 found that instantaneous residual firing rate strongly correlates with instantaneous residual velocity for  
65 both within-trial and across-trials analyses. The peak correlation was best aligned with the time of peak  
66 eye velocity, and at a population level, the correlation was significant throughout the movement. Neurons  
67 with the highest firing rates within individual penetrations displayed the strongest correlation. Finally,  
68 the relationship was observed not only for ballistic-like, bell-shaped velocity waveforms of normal  
69 saccades but also for profiles altered by blink perturbations. Thus, individual SC neurons exhibit a code  
70 that can control instantaneous eye velocity, akin to how primary motor cortex controls hand velocity  
71 (Ashe and Georgopoulos, 1994; Reina et al., 2001) Our finding also argues against a serial process for  
72 transforming spatially encoded information into a rate code.

## 73 74 **Methods**

75  
76 Two adult rhesus monkeys (*Macaca mulatta*, 1 male and 1 female, ages 8 and 10, respectively) were used  
77 for the study. All procedures were approved by the Institutional Animal Care and Use Committee at the  
78 University of Pittsburgh and were in compliance with the US Public Health Service policy on the humane  
79 care and use of laboratory animals.

80  
81 Extracellular spiking activity of SC neurons were recorded as head-restrained animals performed a  
82 visually-guided, delayed saccade task under real-time control with a LabVIEW-based controller interface  
83 (Bryant and Gandhi, 2005). Neural activity was collected with either a multi-contact laminar probe  
84 (Alpha Omega; 16 channels, 150  $\mu\text{m}$  inter-contact distance,  $\sim 1\text{ M}\Omega$  impedance of each contact) or a  
85 standard tungsten microelectrode (Microprobes,  $\sim 1\text{ M}\Omega$  impedance). All electrode penetrations were  
86 orthogonal to the SC surface, so that roughly the same motor vector was encoded across the layers. The  
87 saccade target was presented either near the center of the neuron's movement field or at the diametrically  
88 opposite location. This study reports analyses from 189 neurons, 145 of which were collected with a  
89 laminar probe across 18 sessions, and the remaining 44 neurons were recorded with a single electrode  
90 (Jagadisan and Gandhi, 2017). All neurons can be classified as visuomotor or motor neurons according to  
91 standard criterion, which we have described previously (Jagadisan and Gandhi, 2016).

92  
93 Blink perturbation data were only available for the 50 neurons, 44 of which were studied with the single  
94 electrode setup and the remaining 7 from a single laminar electrode session. On approximately 15-20%  
95 of the trials, an air-puff was delivered to one eye to invoke the trigeminal blink reflex. The puff was timed  
96 to induce a blink around the time of saccade onset or even trigger the eye movement prematurely. In this  
97 case, blink-triggered saccades provide a valuable control against spurious correlations, as the velocity  
98 profile of the saccade is altered compared to that of a normal movement and endpoint accuracy is

99 preserved. Thus, if SC dynamically controls the kinematics of the saccade, the perturbed velocity  
100 waveforms should be predicted by the SC activity as well. For full disclosure, the data from these 50  
101 neurons are the same as those reported in a previous publication (Jagadisan & Gandhi 2017). The key  
102 distinction is that the previous study assayed SC activity during the saccade preparation phase, and now  
103 the focus is on the peri-saccade period.

104

105 Eye and eyelid movements were detected using the magnetic search coil method. Spike trains were  
106 converted to a spike density waveform by convolution with a 5 ms Gaussian kernel. All movements were  
107 aligned on saccade onset and standard velocity criteria were used to detect the onset and offset of normal  
108 saccades. For blink-triggered movements, the onset of saccadic component was estimated as the time of a  
109 deviation from a spatiotemporal template of a blink related eye movement induced during fixation  
110 (Katnani and Gandhi, 2013). The movement profiles were then transformed into radial coordinates in  
111 which positive values indicate vectorial velocity towards the movement field and negative values away  
112 (Jagadisan and Gandhi, 2017); this differs from the common method in which vectorial velocity  
113 representation is always positive and independent of the ideal saccade path towards the target. This  
114 distinction is vital, as we were not able to observe the effects described later when using traditional  
115 vectorial coordinates. To remove potential confounds of saccade amplitude on correlations between  
116 spiking activity and radial velocity, we additionally limited each neuron's dataset to movements within  
117  $\pm 5\%$  of the mean amplitude (range: 8-25 degrees; median: 12 degrees) and, for the analysis comparing  
118 normal and blink-perturbed movements, at least 20 trials for each condition. All 189 neurons passed the  
119 inclusion criteria, 50 of which also had amplitude-matched blink perturbation trials.

120

121 For each neuron we subtracted the session's mean velocity and spike density waveforms from each trial's  
122 data to obtain the respective residuals. This important step removes spurious correlations from generally  
123 similar shapes of SC activity and saccade velocity. For within-trial analysis, a Pearson's correlation was  
124 determined for each trial's residual velocity and neural activity waveforms. The two residual vectors were  
125 shifted relative to each other from 100 ms to  $-100$  ms in 1 ms increments, and the Pearson's correlation  
126 was calculated for each delay ( $\Delta t$ ). A zero delay indicates that both vectors are aligned on saccade onset.  
127 Negative delays signify instances when the neural activity preceded the velocity, which we refer to as a  
128 efferent delay (ED). This analysis was performed for every residual neural activity – velocity waveform  
129 pairing for each trial of each cell. For across-trials analysis, we created a vector of activity residuals at  
130 time  $t$  and a corresponding vector of velocity residuals at time  $t + \Delta t$ , where the length of the vectors  
131 equals the number of trials. The Pearson correlation between these two vectors was determined. We  
132 repeated this procedure for every timepoint in the saccade and for every 1 ms shift, resulting in a  
133 correlation coefficient for each combination of time relative to saccade onset and delay. This technique  
134 allowed us to examine the SC effects on eye velocity at every timepoint of the saccade in 1 ms resolution.  
135 We repeated both correlational analyses on blink-perturbed trials to see if the results persist even when  
136 the saccade properties are altered.

137

138 To further validate that the influence of the SC on velocity continues throughout the entirety of the  
139 saccade, we calculated the duration of significant correlation for each cell. To do this, we determined the  
140 confidence threshold by performing the across-trial analysis on shuffled data for each cell one hundred

141 times. Then we determined that the correlation was significant at those points where the real correlation  
142 exceeded 2 standard deviations around the mean of the shuffled results. Summing the instances at which  
143 correlation was significant gave us the total duration of the correlation.

144

145 To determine the significance of the results of within-trial analysis, we randomly paired a residual  
146 velocity trace of one trial with residual activity data of another trial from the same session's data and  
147 determined the Pearson correlation for the span of delay values. For across-trials analysis, we randomly  
148 shuffled the order of elements in each residual vector (instantaneous across-trial shuffle) before  
149 determining the correlation coefficient. The shuffling procedures were repeated 100 times for both types  
150 of analyses. Deviations of unshuffled correlation results outside 2 standard deviation bounds generated  
151 from shuffled data were deemed statistically significant.

152

153 In a separate analysis we looked at the subset of data which was collected using laminar probes. This  
154 subset allowed us to examine the effect of depth of SC neurons on our results. The number of channels  
155 with neural data ranged from 4 to 16 per session. Since each session did not have enough channels for  
156 sufficient statistical power, we de-meaned the data from each session and combined all channels. We then  
157 used linear regression on the de-meaned correlation coefficients of these channels and the corresponding  
158 FR to establish a trend.

159

## 160 **Results**

161

162 The relationship between SC activity and saccade dynamics can be intuitively queried by correlating the  
163 firing rate with velocity for different transduction delays. Figure 1A plots the results of such within-trial  
164 analysis for normal saccades across all 189 neurons in our database. The mean peak Pearson correlation  
165 ( $r = 0.179$ ) was observed for an efferent delay (ED) of 13 *ms*, equivalently  $\Delta t = -13$  *ms*. The  
166 correlation was significantly different from the pattern observed for shuffled data. This result therefore  
167 indicates that the residuals of both SC activity and eye velocity fluctuate around the mean in a coherent  
168 fashion and that SC activity can influence saccade velocity.

169

170 A major limitation of within-trial analysis is that it offers no information about the correlation at each  
171 timepoint within the saccade. The correlation coefficient could peak if any sufficiently long sequence of  
172 the activity correlates with the corresponding sequence in velocity. One can imagine that SC could,  
173 perhaps, encode the accelerating phase of the eye movement and the deceleration phase could be  
174 unaffected by SC activity, and rather be guided by muscle viscoelastic properties. In this case, the  
175 correlation would peak at a particular ED because the first half of both signals is correlated, but would  
176 provide little evidence to support our hypothesis that SC dynamically influences the entire saccade. We  
177 therefore employed across-trials analysis to determine precisely the time-course of correlation between  
178 activity and velocity.

179

180 Assembled across trials, the residual firing rates were correlated with residual eye velocities separated by  
181 a delay. This procedure was repeated for a large range of delays and for all times points of a saccade.  
182 Figure 1B shows the correlation coefficients for all combinations of saccade time points and ED values. A

183 horizontal band of high correlation values is noted for the duration of the saccade for an ED of 12 *ms*.  
184 The correlation values in this band (Figure 1C) are even higher (peak:  $r = 0.278$ ) than that found in  
185 within-trial analysis. Results from the across-trials analysis therefore provide the strongest evidence that  
186 SC dynamically influences eye velocity throughout the entire saccade. Additionally, it is prudent to  
187 mention that this analysis is identical whether performed on residuals or raw data, thus providing a more  
188 direct evidence of correlation as compared to the within-trials analysis.

189  
190 Next, we explored the temporal characteristics of instantaneous activity-velocity correlations. We found  
191 that the time of peak correlation was well aligned with the time of peak velocity, after accounting for the  
192 efferent delay, for each neuron (Figure 2A). A paired *t*-test could not reject the null hypothesis that the  
193 mean difference was zero ( $p = 0.15$ ). In contrast, the duration of the SC influence over the saccade  
194 velocity reveals a flat distribution (Figure 2B), and cells that had a shorter duration of significant  
195 correlation tended to have a lower peak correlation (Figure 2C;  $r = 0.53, p = 1.99 \times 10^{-33}$ , [*f* –  
196 *test*, *MATLAB regress function*]). The relationship between degree and duration of influence could be  
197 explained by cells with higher correlation values having a higher likelihood of rising above the  
198 significance level over time. Thus, SC neurons tend to exhibit most influence over eye kinematics around  
199 the peak of the saccade velocity profile, and those cells which showed a higher peak correlation continued  
200 to influence eye velocity well past the peak, to saccade completion.

201  
202 We then studied which properties of the neuronal population contributed to significant correlations. When  
203 examining the entire population of cells, simple linear models found no relationship between a cell's peak  
204 correlation and its peak firing rate or its location along the rostral-caudal extent of the SC ( $p = 0.088, f -$   
205 *test*). However, when we isolated only the cells from a single laminar recording, we observed an  
206 increasing trend between the cells FR and its peak correlation (Figure 3A). When data from the laminar  
207 recordings was pooled by subtracting the average peak firing rate and correlation measures of each  
208 session, a statistically significant linear relationship was observed (Figure 3B,  $p = 7.4 \times 10^{-6}, f -$  *test*).  
209 This suggests that there is a strong relationship between firing rate and instantaneous velocity within  
210 individual columns of the SC.

211  
212 To assess the robustness of the influence of SC activity over instantaneous eye velocity we turned to the  
213 50 neurons for which we also had blink-perturbation data. Such saccades do not exhibit the stereotypical,  
214 bell-shaped profile and therefore offer an opportunity to assess if the correlation persists even in the  
215 presence of perturbation. The top row of Figure 4 displays the within- and across-trial analyses for normal  
216 trials in the 50 neurons. The general trend is preserved, even with the majority of data removed. The best  
217 EDs for the normal, unperturbed data were 11 *ms* and 12 *ms* and the peak correlations were  $r = 0.267$   
218 and  $r = 0.441$  for within- and across-trial analyses, respectively. For the blink-perturbed data from the  
219 same neurons, the peak correlations were  $r = 0.210$  and  $r = 0.386$  for both within- and across-trial  
220 analyses, respectively; and the ED was 13 for both. Correlative relationship was largely intact despite the  
221 blink-induced perturbation.

222  
223 To further characterize the impact of blink perturbation, we computed for each neuron the linear  
224 relationship between residual activity and velocity distributions across the duration of the movement.

225 Assuming the data contained  $n$  trials and the average duration of the amplitude-matched saccades is  
226  $d$  ms, a single regression was performed across  $nd$  points. The activity data were time shifted relative to  
227 the velocity distribution to account for the neuron's ED. This was done separately for the normal and  
228 blink-perturbed data from each of the 50 neurons. Figure 5A shows a scatter plot of the regression slopes  
229 for each neuron in the two conditions. Overall, the slopes tended to be greater during the blink condition  
230 (paired t-test  $p=0.0013$ ). Moreover, we found a strong relationship between each neuron's regression  
231 slope and the goodness of fit in both normal ( $r=0.72$ ,  $p=2.37\times 10^{-7}$ ) and perturbation ( $r=0.35$ ,  $p=0.02$ )  
232 conditions (Figure 5B).

233

## 234 Discussion

235

236 We revealed an intuitive yet, to our knowledge, unreported phenomenon on how SC activity exerts  
237 instantaneous control over saccadic eye movements. We found a strong correlation between the motor  
238 burst of SC neurons and eye velocity for an efferent delay of approximately 12 ms. The correlation was  
239 noted for both within-trial and across-trials analyses. The latter approach, in particular, demonstrated that  
240 the correlation remained high for the duration of saccade, lending support for SC control of instantaneous  
241 eye speed and thereby modifying the notion of spatiotemporal transformation. In addition, this approach  
242 revealed a robust distributed population coding scheme reminiscent of a synfire chain (Diesmann et al.,  
243 1999; Shmiel et al., 2006), wherein individual neurons exert influence over saccade dynamics  
244 sequentially at different times, collectively spanning the duration of the saccade. Comparable correlation  
245 structure and ED were also observed for blink-perturbed movements, whose velocity profiles deviate  
246 significantly from the stereotypical bell-shaped waveforms (Goossens and Van Opstal, 2000; Gandhi and  
247 Bonadonna, 2005), although it was particularly important to project the velocity vector onto the preferred  
248 vector of the SC neuron (Jagadisan and Gandhi, 2017). We also learned that, within individual collicular  
249 columns, cells with higher FR tend to exhibit a stronger correlation with velocity, suggesting a  
250 relationship based on the depth of each cell as well as its spiking properties. Finally, we uncovered the  
251 interesting feature that regressions with the largest correlations also had the biggest slopes, implying that  
252 eye velocity is more sensitive to firing rates of the more reliable neurons.

253

254 Previous studies have addressed relationships between neural activity and movement parameters in  
255 several ways. For SC control of saccades, the focus has been on static parameters. For example, weaker  
256 bursts of activity produce saccades with lower peak velocity (Edelman and Goldberg, 2001), peak  
257 velocity is correlated with frequency or intensity of microstimulation (Stanford et al., 1996; Katnani and  
258 Gandhi, 2012), and peak velocity is attenuated after inactivation of SC (Sparks et al., 1990). Modest  
259 correlations with SC activity have also been reported for head movements (Walton et al., 2007; Rezvani  
260 and Corneil, 2008) and electromyographic activity in proximal limb muscles (Stuphorn et al., 1999).  
261 Instantaneous control of saccades has been studied or discussed for neurons downstream of the SC, in the  
262 oculomotor brainstem (Cullen and Guitton, 1997; Sylvestre and Cullen, 1999; Sparks and Gandhi, 2003).  
263 Such analyses are also more common in the skeletomotor system, with significant correlations identified  
264 between neural activity waveforms in cortical areas and hand velocity profiles (Ashe and Georgopoulos,  
265 1994; Reina et al., 2001). Trial-to-trial variability in eye and hand velocity has also been attributed to  
266 variability in neural activity occurring earlier in the trial, for instance during sensory input (Osborne et al.,

267 2005; Huang and Lisberger, 2009) and motor preparation (Churchland et al., 2006; Jagadisan and Gandhi,  
268 2017), but this perspective precludes insight into direct dynamic control during ongoing movements.

269  
270 We believe our study is the first to quantify correlations informative of instantaneous control of saccades  
271 by SC neurons. This finding does not conform readily to the standard role of SC in saccade generation,  
272 that the spatial distribution of population activity in the deeper layers determines the saccade vector and  
273 that downstream structures generate the firing patterns that reflect the velocity profile of the eye  
274 movement. The result that SC activity does influence peak saccade velocity (cited above) somewhat  
275 aligns to a modified framework, the dual coding hypothesis (Sparks and Mays, 1990), in which the level  
276 of SC activity acts as a gain factor on the brainstem burst generator (Nichols and Sparks, 1996). However,  
277 influencing saccade speed through a global gain is not equivalent to imposing instantaneous control. In  
278 contrast, a dynamic vector summation algorithm (Goossens and Van Opstal, 2006; Goossens and van  
279 Opstal, 2012) offers a more compelling framework in which the SC controls the *desired* instantaneous  
280 displacement of the eye. Crucially, this model abstains from making direct statements about instantaneous  
281 velocity control. It is possible this is because SC neurons do not have a relationship between the average  
282 firing rate and the velocity of the saccade they code for. In other words, low firing cells could code for  
283 high-velocity saccades, and high-firing cells could code for low-velocity saccades, depending on where  
284 they reside in the collicular map. Our analysis circumvents this limitation by examining residuals. We  
285 suggest that the static parameters of the saccade are controlled by traditionally understood methods (e.g.  
286 dual coding hypothesis) while deviations from the optimal velocity profile are influenced by dynamic  
287 fluctuations of neural activity residuals. This proposed framework is capable of functioning in tandem  
288 with the aforementioned dynamic vector summation model, as long as the model accounts for the  
289 fluctuations in the residual activity of each cell.

290  
291 The efferent delay is indicative of the transduction time of neural signals from the SC to the extraocular  
292 muscles. Studies of SC stimulation have established a 25 – 30 *ms* latency for movement initiation  
293 (Stanford et al., 1996; Katnani and Gandhi, 2012) and a shorter 10 – 12 *ms* delay for perturbing an  
294 ongoing movement (Munoz and Wurtz, 1993; Miyashita and Hikosaka, 1996; Gandhi and Keller, 1999).  
295 The ED that yielded the strongest correlation from our neural recording data was approximately 12 *ms*.  
296 Crucially, it remained relatively constant throughout the movement, although we did observe a broader  
297 range of ED values with higher correlation coefficients around saccade onset (Figure 1B). While the ED  
298 values may seem different for microstimulation and recordings studies, a direct comparison should be  
299 avoided because underlying network level processes associated with movement preparation, which are  
300 implicitly incorporated in neural activity, may be different when microstimulation is used to trigger a  
301 movement.

302  
303 We are intrigued by the observation that peak correlation between activity and velocity increased as a  
304 function of peak firing rate, but only for neurons within a SC “column” and not across the entire  
305 population (Figure 3A). Analyses from separate, unpublished work in our laboratory indicate that peak  
306 firing rate of the motor burst changes nonlinearly with depth, reaching a maximum in the intermediate  
307 layers and decreasing gradually for dorsal and ventral locations. Neurons with the highest firing rates



308 resemble the classical saccade-related burst neurons, some with buildup activity, and are likely those that  
309 project to the gaze centers in the brainstem (May, 2005; Rodgers et al., 2006).

310

311 Finally, we found it interesting that the regression slopes tended to be higher for blink-perturbation trials  
312 than for unperturbed movements (Figure 5A). We speculate that reacceleration of saccades in the blink-  
313 perturbation condition (Goossens and Van Opstal, 2000; Gandhi and Bonadonna, 2005) produces  
314 residuals that likely increase the regression slope. However, we also note that the variance accounted for  
315 ( $r^2$ ) by these fits were lower for the blink condition (Figure 5B). This suggests that although SC activity  
316 is updated to reflect the change in velocity, this compensation is likely not complete and that additional  
317 temporal control signals are added downstream in the brainstem burst generator.

318

319 In summary, we present here compelling evidence that the SC has dynamic influence over every aspect of  
320 the saccade. The result impacts the notion of spatiotemporal transformation, which is thought to be a  
321 serial process of first encoding the movement in a retinotopic reference frame (place code) and then  
322 transforming it into a rate code to control its dynamics (Groh, 2001). The SC is considered the last stage  
323 of the spatial representation and gaze centers in the lower brainstem employ the temporal algorithm. Our  
324 analyses show a clear role of the SC in also exerting temporal control over the duration of the movement,  
325 casting a shadow on a simplistic and serial sensorimotor transformation framework. In doing so, the  
326 result aligns well with observations from skeletomotor research, where it was demonstrated decades ago  
327 that neurons in the cortex encode velocity of hand movement (Ashe and Georgopoulos, 1994; Reina et al.,  
328 2001).

329

330

### 331 **Acknowledgements**

332

333 Funding for this research was provided by the following grants: NIH T32 DC011499, R01 EY022854,  
334 R01 EY024831, and F31 EY027688.

335

### 336 **Figure legends**

337

#### 338 **Figure 1: Summary of within- and across-trial correlation analyses for normal saccades. (A)**

339 Within-trial correlation analysis. Black line denotes the correlation coefficient between activity and  
340 velocity residuals as a function of the temporal shift. The gray outline is two standard errors around the  
341 mean patterns from 189 neurons. Pink line and outline represent the mean correlation coefficients and two  
342 standard deviations from the mean of the shuffled data. (B) Across-trials correlation analysis. Heatmap of  
343 correlation coefficients between SC activity and eye velocity residuals for each timepoint during the  
344 saccade (abscissa) and temporal shift between the two residual vectors (ordinate). Arrow and horizontal  
345 dashed line mark the efferent delay at which the average correlation was highest (-12ms). Left and right  
346 vertical red lines indicate respectively the beginning and the end of the shortest saccade in the dataset.  
347 Data past rightmost red bar excludes saccades which have terminated prior to the timepoints on the x-  
348 axis. (C) Correlation coefficients as a function of saccade timepoints for the optimal ED shown in (B).

349 Pink line and outline represent the mean and two standard deviations for the across-trials analysis  
350 performed on shuffled data.

351 **Figure 2: Temporal characteristics of activity-velocity correlation.** (A) Histogram of average peak  
352 correlation time relative to average peak velocity time for each neuron. The count on y-axis indicates the  
353 number of neurons. (B) Histogram of cumulative duration (as proportion of total saccade length) for  
354 which the correlation remained above significance level. (C) Relationship between peak correlation and  
355 the duration of the correlation. Each point indicates one neuron. Blue line is the best fit line to the data.

356 **Figure 3: Analysis of data recorded from laminar probes.** (A) Peak correlation of each SC neuron is  
357 plotted against the average peak firing rate of that neuron. Neurons recorded in the same penetration are  
358 plotted as the same color, each color represents data from different sessions. The best fit line to each  
359 session's data is shown in the matching color. (B) Data from (A) de-meanded and pooled across sessions.  
360 Each de-meanded value is obtained after subtracting the respective average across all neurons in its track.  
361 The dashed red line is the best fit line.

362 **Figure 4: Comparison of correlation analyses for blink-perturbed and normal saccades.** Within-trial  
363 correlation between activity and velocity residuals for (A) normal and (D) blink-perturbed saccades  
364 available for 50 of 189 neurons. The heatmaps of correlation coefficients obtained from across-trials  
365 analysis for (B) normal and (E) blink-perturbed movements. Correlation coefficients as a function of  
366 saccade timepoints for the optimal ED for (C) normal and (F) blink-perturbed saccades. The plots follow  
367 the same conventions used in Figure 1.

368 **Figure 5: Linear regression features between SC activity and eye velocity.** (A) A pairwise comparison  
369 of the regression slopes obtained for normal (x-axis) and blink-perturbed (y-axis) conditions for each  
370 neuron. Every neuron had a statistically significant slope for at least one of the two conditions. Cyan:  
371 normal trials only; magenta: blink perturbation trials only; black: both types of trials. The dashed line  
372 represents the unity relationship. (B) Relationship between slope and  $R^2$  values. Cyan: normal trials.  
373 Magenta: blink perturbation trials.

374

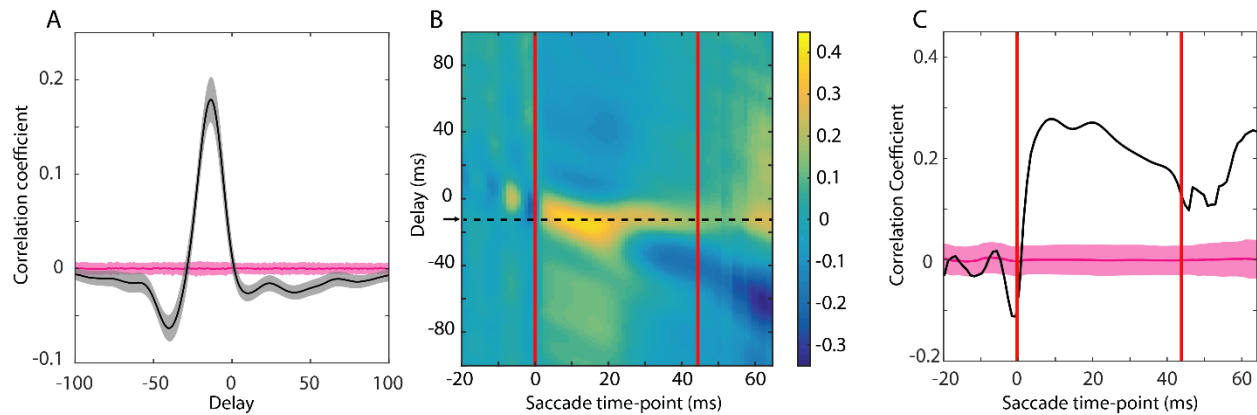

375

376 **Figure 1: Summary of within- and across-trial correlation analyses for normal saccades. (A)**

377 Within-trial correlation analysis. Black line denotes the correlation coefficient between activity and

378 velocity residuals as a function of the temporal shift. The gray outline is two standard errors around the

379 mean patterns from 189 neurons. Pink line and outline represent the mean correlation coefficients and two

380 standard deviations from the mean of the shuffled data. (B) Across-trials correlation analysis. Heatmap of

381 correlation coefficients between SC activity and eye velocity residuals for each timepoint during the

382 saccade (abscissa) and temporal shift between the two residual vectors (ordinate). Arrow and horizontal

383 dashed line mark the efferent delay at which the average correlation was highest (-12ms). Left and right

384 vertical red lines indicate respectively the beginning and the end of the shortest saccade in the dataset.

385 Data past rightmost red bar excludes saccades which have terminated prior to the timepoints on the x-

386 axis. (C) Correlation coefficients as a function of saccade timepoints for the optimal ED shown in (B).

387 Pink line and outline represent the mean and two standard deviations for the across-trials analysis

388 performed on shuffled data.

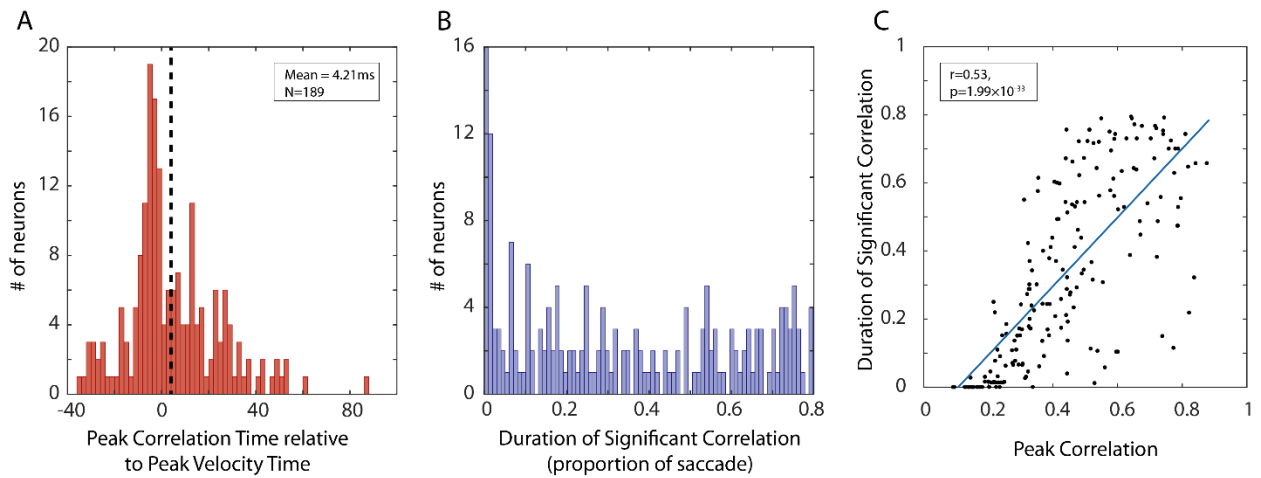

389

390 **Figure 2: Temporal characteristics of activity-velocity correlation.** (A) Histogram of average peak  
391 correlation time relative to average peak velocity time for each neuron. The count on y-axis indicates the  
392 number of neurons. (B) Histogram of cumulative duration (as proportion of total saccade length) for  
393 which the correlation remained above significance level. (C) Relationship between peak correlation and  
394 the duration of the correlation. Each point indicates one neuron. Blue line is the best fit line to the data.

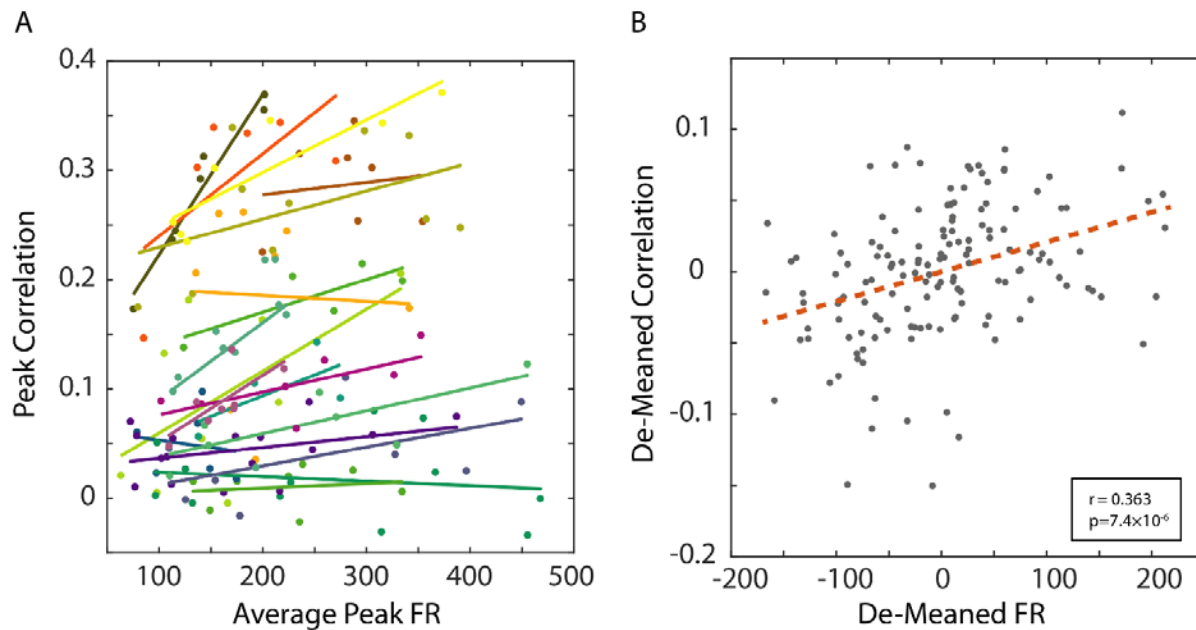

395

396 **Figure 3: Analysis of data recorded from laminar probes.** (A) Peak correlation of each SC neuron is  
397 plotted against the average peak firing rate of that neuron. Neurons recorded in the same penetration are  
398 plotted as the same color, each color represents data from different sessions. The best fit line to each  
399 session's data is shown in the matching color. (B) Data from (A) de-meaned and pooled across sessions.  
400 Each de-meaned value is obtained after subtracting the respective average across all neurons in its track.  
401 The dashed red line is the best fit line.

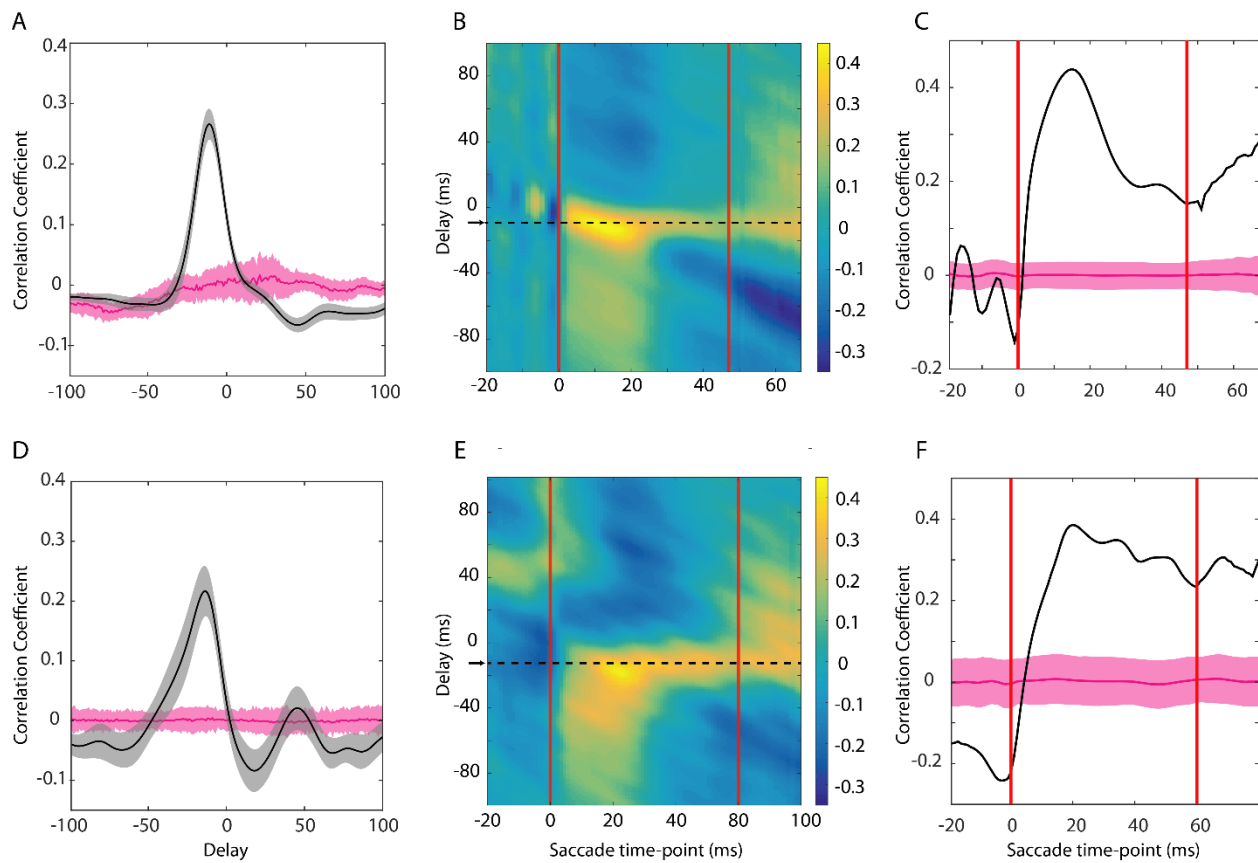

402

403 **Figure 4: Comparison of correlation analyses for blink-perturbed and normal saccades.** Within-trial  
404 correlation between activity and velocity residuals for (A) normal and (D) blink-perturbed saccades  
405 available for 50 of 189 neurons. The heatmaps of correlation coefficients obtained from across-trials  
406 analysis for (B) normal and (E) blink-perturbed movements. Correlation coefficients as a function of  
407 saccade timepoints for the optimal ED for (C) normal and (F) blink-perturbed saccades. The plots follow  
408 the same conventions used in Figure 1.

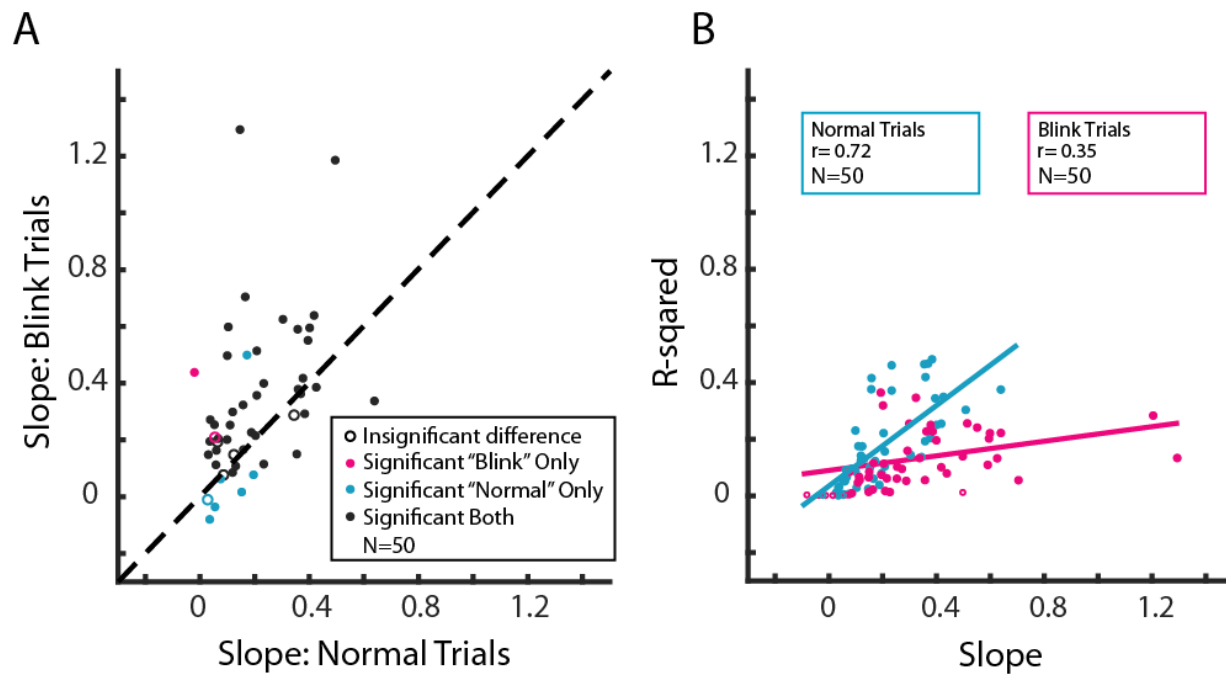

409

410 **Figure 5: Linear regression features between SC activity and eye velocity.** (A) A pairwise comparison  
411 of the regression slopes obtained for normal (x-axis) and blink-perturbed (y-axis) conditions for each  
412 neuron. Every neuron had a statistically significant slope for at least one of the two conditions. Cyan:  
413 normal trials only; magenta: blink perturbation trials only; black: both types of trials. The dashed line  
414 represents the unity relationship. (B) Relationship between slope and  $R^2$  values. Cyan: normal trials.  
415 Magenta: blink perturbation trials.

416 **References**

- 417 Ashe J, Georgopoulos AP (1994) Movement parameters and neural activity in motor cortex and area 5.  
418 *Cereb Cortex* 4:590–600 Available at: <http://www.ncbi.nlm.nih.gov/pubmed/7703686>.
- 419 Basso MA, May PJ (2017) Circuits for Action and Cognition: A View from the Superior Colliculus.  
420 *Annu Rev Vis Sci* 3:197–226 Available at:  
421 <http://www.ncbi.nlm.nih.gov/pubmed/28617660><http://www.pubmedcentral.nih.gov/articlerend>  
422 [er.fcgi?artid=PMC5752317](http://www.ncbi.nlm.nih.gov/pubmed/28617660).
- 423 Bryant CL, Gandhi NJ (2005) Real-time data acquisition and control system for the measurement of  
424 motor and neural data. *J Neurosci Methods* 142:193–200.
- 425 Carmena JM, Lebedev MA, Henriquez CS, Nicolelis MAL (2005) Stable ensemble performance with  
426 single-neuron variability during reaching movements in primates. *J Neurosci* 25:10712–10716  
427 Available at: <http://www.jneurosci.org/cgi/doi/10.1523/JNEUROSCI.2772-05.2005>.
- 428 Churchland MM (2015) Using the precision of the primate to study the origins of movement variability.  
429 *Neuroscience* 296:92–100.
- 430 Churchland MM, Santhanam G, Shenoy K V. (2006) Preparatory Activity in Premotor and Motor Cortex  
431 Reflects the Speed of the Upcoming Reach. *J Neurophysiol* 96:3130–3146 Available at:  
432 <http://jn.physiology.org/cgi/doi/10.1152/jn.00307.2006>.
- 433 Cullen KE, Guitton D (1997) Analysis of primate IBN spike trains using system identification techniques.  
434 III. Relationship To motor error during head-fixed saccades and head-free gaze shifts. *J*  
435 *Neurophysiol* 78:3307–3322 Available at: <http://www.ncbi.nlm.nih.gov/pubmed/9405546>.
- 436 Diesmann M, Gewaltig MO, Aertsen A (1999) Stable propagation of synchronous spiking in cortical  
437 neural networks. *Nature* 402:529–533 Available at:  
438 <http://www.ncbi.nlm.nih.gov/pubmed/10591212>.
- 439 Edelman JAYA, Goldberg ME (2001) Dependence of saccade-related activity in the primate superior  
440 colliculus on visual target presence. *J Neurophysiol* 86:676–691 Available at:  
441 <http://www.ncbi.nlm.nih.gov/pubmed/11495942>.
- 442 Gandhi NJ, Bonadonna DK (2005) Temporal Interactions of Air-Puff–Evoked Blinks and Saccadic Eye  
443 Movements: Insights Into Motor Preparation. *J Neurophysiol* 93:1718–1729 Available at:  
444 <http://www.physiology.org/doi/10.1152/jn.00854.2004>.
- 445 Gandhi NJ, Katnani HA (2011) Motor Functions of the Superior Colliculus. *Annu Rev Neurosci* 34:205–  
446 231 Available at: <http://www.annualreviews.org/doi/10.1146/annurev-neuro-061010-113728>.
- 447 Gandhi NJ, Keller EL (1999) Comparison of saccades perturbed by stimulation of the rostral superior  
448 colliculus, the caudal superior colliculus, and the omnipause neuron region. *J Neurophysiol*  
449 82:3236–3253 Available at: <http://www.ncbi.nlm.nih.gov/pubmed/10601457>.
- 450 Goossens HJLM, van Opstal AJ (2012) Optimal control of saccades by spatial-temporal activity patterns  
451 in the monkey superior colliculus Maloney LT, ed. *PLoS Comput Biol* 8:e1002508 Available at:  
452 <http://www.ncbi.nlm.nih.gov/pubmed/22615548>.
- 453 Goossens HJLM, Van Opstal AJ (2000) Blink-perturbed saccades in monkey. I. Behavioral analysis. *J*  
454 *Neurophysiol* 83:3411–29 Available at:  
455 [http://www.ncbi.nlm.nih.gov/entrez/query.fcgi?cmd=Retrieve&db=PubMed&dopt=Citation&list\\_uids=10848559](http://www.ncbi.nlm.nih.gov/entrez/query.fcgi?cmd=Retrieve&db=PubMed&dopt=Citation&list_uids=10848559).
- 456
- 457 Goossens HJLM, Van Opstal AJ (2006) Dynamic ensemble coding of saccades in the monkey superior  
458 colliculus. *J Neurophysiol* 95:2326–2341 Available at:  
459 <http://jn.physiology.org/cgi/doi/10.1152/jn.00889.2005>.
- 460 Groh JM (2001) Converting neural signals from place codes to rate codes. *Biol Cybern* 85:159–165  
461 Available at: <http://www.ncbi.nlm.nih.gov/pubmed/11561817>.
- 462 Huang X, Lisberger SG (2009) Noise correlations in cortical area MT and their potential impact on trial-  
463 by-trial variation in the direction and speed of smooth-pursuit eye movements. *J Neurophysiol*



- 464 101:3012–3030 Available at: <http://jn.physiology.org/cgi/doi/10.1152/jn.00010.2009>.
- 465 Jagadisan UK, Gandhi NJ (2016) Disruption of Fixation Reveals Latent Sensorimotor Processes in the  
466 Superior Colliculus. *J Neurosci* 36:6129–6140 Available at:  
467 <http://www.jneurosci.org/cgi/doi/10.1523/JNEUROSCI.3685-15.2016>.
- 468 Jagadisan UK, Gandhi NJ (2017) Removal of inhibition uncovers latent movement potential during  
469 preparation. *Elife* 6 Available at: <http://www.ncbi.nlm.nih.gov/pubmed/28891467>.
- 470 Katnani HA, Gandhi NJ (2012) The relative impact of microstimulation parameters on movement  
471 generation. *J Neurophysiol* 108:528–538 Available at:  
472 <http://jn.physiology.org/cgi/doi/10.1152/jn.00257.2012>.
- 473 Katnani HA, Gandhi NJ (2013) Time course of motor preparation during visual search with flexible  
474 stimulus-response association. *J Neurosci* 33:10057–10065 Available at:  
475 <http://www.jneurosci.org/cgi/doi/10.1523/JNEUROSCI.0850-13.2013>.
- 476 Lee J, Groh JM (2014) Different stimuli, different spatial codes: A visual map and an auditory rate code  
477 for oculomotor space in the primate superior colliculus. *PLoS One* 9:e85017 Available at:  
478 <http://www.ncbi.nlm.nih.gov/pubmed/24454779>.
- 479 May PJ (2005) The mammalian superior colliculus: Laminar structure and connections. *Prog Brain Res*  
480 151:321–378 Available at: <http://www.ncbi.nlm.nih.gov/pubmed/16221594> [Accessed March 18,  
481 2018].
- 482 Miyashita N, Hikosaka O (1996) Minimal synaptic delay in the saccadic output pathway of the superior  
483 colliculus studied in awake monkey. *Exp Brain Res* 112:187–196 Available at:  
484 <http://www.ncbi.nlm.nih.gov/pubmed/8951387>.
- 485 Munoz DP, Wurtz RH (1993) Fixation cells in monkey superior colliculus. I. Characteristics of cell  
486 discharge. *J Neurophysiol* 70:559–575 Available at: <http://www.ncbi.nlm.nih.gov/pubmed/8410157>.
- 487 Nichols MJ, Sparks DL (1996) Component stretching during oblique stimulation-evoked saccades: the  
488 role of the superior colliculus. *J Neurophysiol* 76:582–600 Available at:  
489 <http://www.ncbi.nlm.nih.gov/pubmed/8836246>.
- 490 Osborne LC, Lisberger SG, Bialek W (2005) A sensory source for motor variation. *Nature* 437:412–416  
491 Available at: <http://www.ncbi.nlm.nih.gov/pubmed/16163357>.
- 492 Reina GA, Moran DW, Schwartz AB (2001) On the relationship between joint angular velocity and motor  
493 cortical discharge during reaching. *J Neurophysiol* 85:2576–2589 Available at:  
494 <http://jn.physiology.org/content/85/6/2576.long>.
- 495 Rezvani S, Corneil BD (2008) Recruitment of a head-turning synergy by low-frequency activity in the  
496 primate superior colliculus. *J Neurophysiol* 100:397–411 Available at:  
497 <http://jn.physiology.org/cgi/doi/10.1152/jn.90223.2008>.
- 498 Rodgers CK, Munoz DP, Scott SH, Paré M (2006) Discharge properties of monkey tectoreticular  
499 neurons. *J Neurophysiol* 95:3502–3511 Available at:  
500 <http://jn.physiology.org/content/95/6/3502.abstract>.
- 501 Shmiel T, Drori R, Shmiel O, Ben-Shaul Y, Nadasdy Z, Shemesh M, Teicher M, Abeles M (2006)  
502 Temporally precise cortical firing patterns are associated with distinct action segments. *J*  
503 *Neurophysiol* 96:2645–2652 Available at: <http://www.ncbi.nlm.nih.gov/pubmed/16885517>.
- 504 Sparks DL, Gandhi NJ (2003) Single cell signals: An oculomotor perspective. *Prog Brain Res* 142:35–53  
505 Available at: <http://www.ncbi.nlm.nih.gov/pubmed/12693253>.
- 506 Sparks DL, Lee C, Rohrer WH (1990) Population coding of the direction, amplitude, and velocity of  
507 saccadic eye movements by neurons in the superior colliculus. *Cold Spring Harb Symp Quant Biol*  
508 55:805–811.
- 509 Sparks DL, Mays LE (1990) Signal transformations required for the generation of saccadic eye  
510 movements. *Annu Rev Neurosci* 13:309–336 Available at:  
511 <http://www.annualreviews.org/doi/10.1146/annurev.ne.13.030190.001521>.
- 512 Stanford TR, Freedman EG, Sparks DL (1996) Site and parameters of microstimulation: evidence for

513 independent effects on the properties of saccades evoked from the primate superior colliculus. *J*  
514 *Neurophysiol* 76:3360–3381 Available at:  
515 <http://www.ncbi.nlm.nih.gov/pubmed/22%5Cnhttp://www.ncbi.nlm.nih.gov/pubmed/8930279>.  
516 Stuphorn V, Hoffmann KP, Miller LE (1999) Correlation of primate superior colliculus and reticular  
517 formation discharge with proximal limb muscle activity. *J Neurophysiol* 81:1978–1982 Available at:  
518 <http://www.ncbi.nlm.nih.gov/pubmed/10200234>.  
519 Sylvestre P a, Cullen KE (1999) Quantitative analysis of abducens neuron discharge dynamics during  
520 saccadic and slow eye movements. *J Neurophysiol* 82:2612–2632 Available at:  
521 <http://www.ncbi.nlm.nih.gov/pubmed/10561431>.  
522 van Beers RJ (2007) The Sources of Variability in Saccadic Eye Movements. *J Neurosci* 27:8757–8770  
523 Available at: <http://www.jneurosci.org/cgi/doi/10.1523/JNEUROSCI.2311-07.2007>.  
524 van Beers RJ (2008) Saccadic eye movements minimize the consequences of motor noise. *PLoS One* 3.  
525 Walton MMG, Bechara B, Gandhi NJ (2007) Role of the primate superior colliculus in the control of  
526 head movements. *J Neurophysiol* 98:2022–2037 Available at:  
527 <http://www.ncbi.nlm.nih.gov/pubmed/17581848>.  
528
